# Supplementary material
Source: publisher figshare collection journal article supplement (https://springernature.figshare.com/ndownloader/files/17085368)

# Type 2 Diabetes

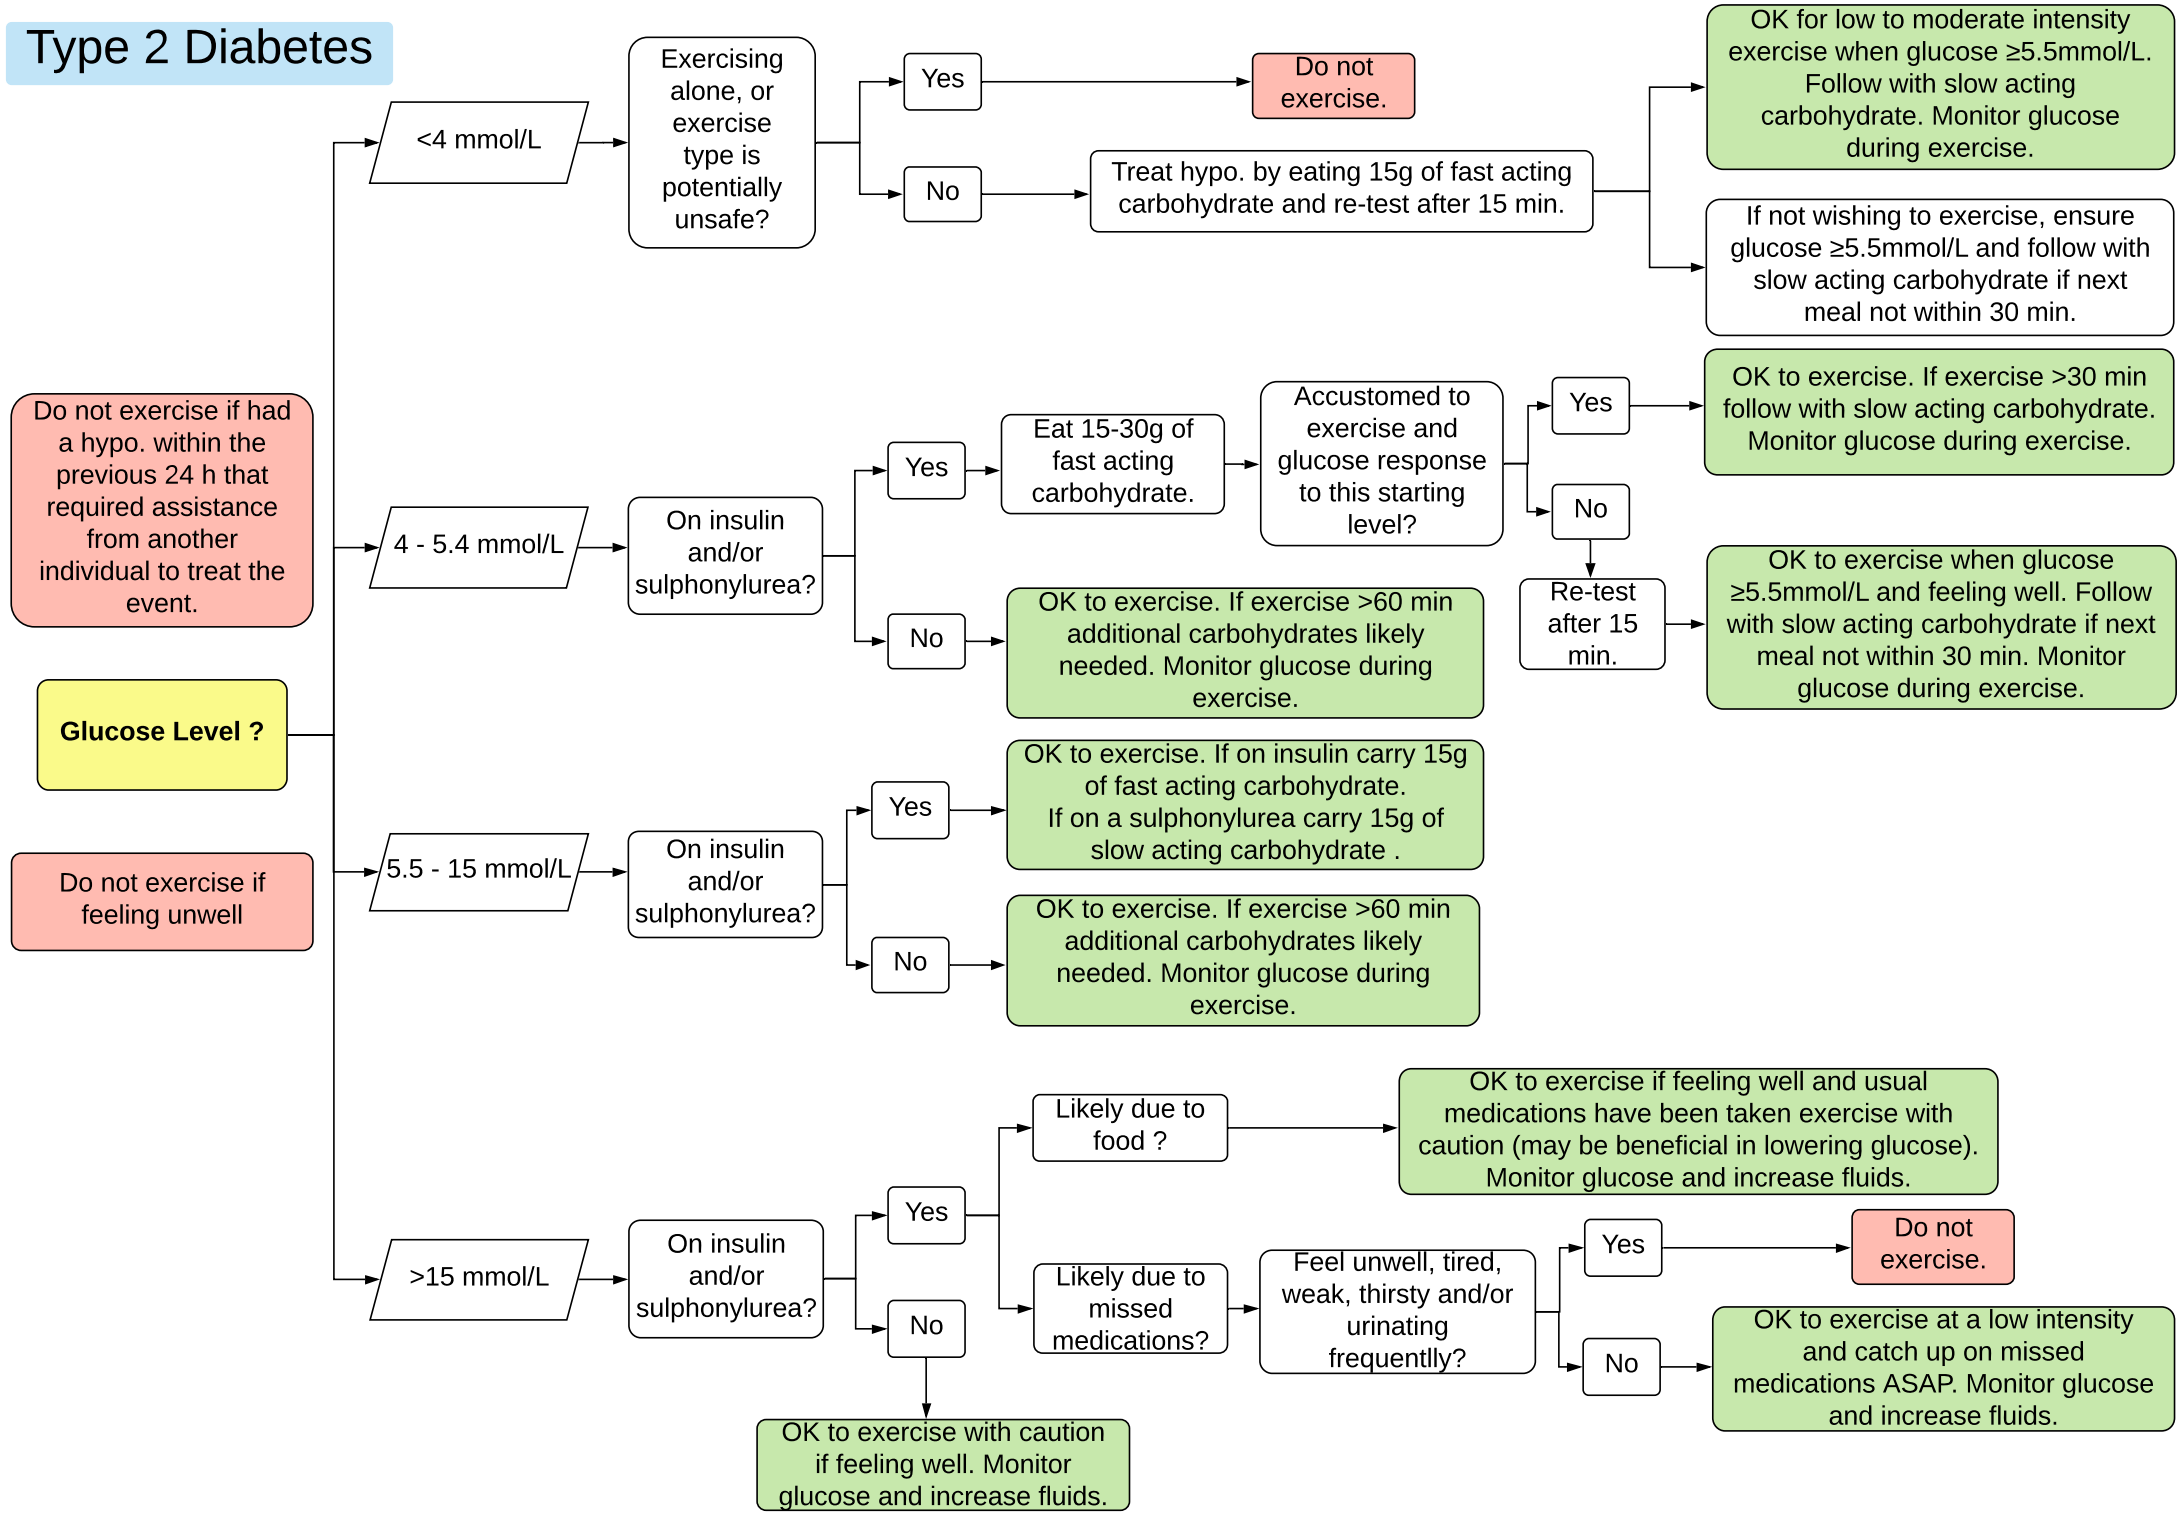

Supplement: Supplementary file [file 17085368]
